# Supplementary material for: Impact of the National Institute for Health and Care Excellence (NICE) guidance on medical technology uptake: analysis of the uptake of spinal cord stimulation in England 2008–2012
Source: PubMed Central journal article supplement — BMJ Open. 2014 Jan 7;4(1):e004182. doi: 10.1136/bmjopen-2013-004182 (PMC3902463; doi:10.1136/bmjopen-2013-004182), 2014-01-07
Supplement: bmjopen-2013-004182.draft_revisions.pdf [file bmjopen-2013-004182.draft_revisions.pdf]

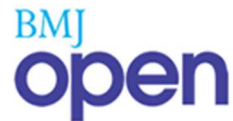

**Impact of National Institute for Health and Care Excellence (NICE) guidance on medical technology uptake: Analysis of the uptake of spinal cord stimulation in England 2008-2012**

|                                 |                                                                                                                                                                                                                                                                                                                                                                                  |
|---------------------------------|----------------------------------------------------------------------------------------------------------------------------------------------------------------------------------------------------------------------------------------------------------------------------------------------------------------------------------------------------------------------------------|
| Journal:                        | <i>BMJ Open</i>                                                                                                                                                                                                                                                                                                                                                                  |
| Manuscript ID:                  | bmjopen-2013-004182                                                                                                                                                                                                                                                                                                                                                              |
| Article Type:                   | Research                                                                                                                                                                                                                                                                                                                                                                         |
| Date Submitted by the Author:   | 06-Oct-2013                                                                                                                                                                                                                                                                                                                                                                      |
| Complete List of Authors:       | Vyawahare, Bharati; James Cook University Hospital, Department of Pain and Anaesthesia<br>Hallas, Natalie; Medtronic UK, Neuromodulation<br>Brookes, Morag; James Cook University Hospital, Department of Pain and Anaesthesia<br>Taylor, Rod; University of Exeter, Peninsula Medical School<br>Eldabe, Sam; James Cook University Hospital, Department of Pain and Anaesthesia |
| <b>Primary Subject Heading</b>: | Health policy                                                                                                                                                                                                                                                                                                                                                                    |
| Secondary Subject Heading:      | Anaesthesia, Health economics, Neurology                                                                                                                                                                                                                                                                                                                                         |
| Keywords:                       | Pain management < ANAESTHETICS, Health economics < HEALTH SERVICES ADMINISTRATION & MANAGEMENT, Health policy < HEALTH SERVICES ADMINISTRATION & MANAGEMENT, Neurological pain < NEUROLOGY, PAIN MANAGEMENT                                                                                                                                                                      |
|                                 |                                                                                                                                                                                                                                                                                                                                                                                  |

SCHOLARONE™  
Manuscripts

# Impact of National Institute for Health and Care Excellence (NICE) guidance on medical technology uptake: Analysis of the uptake of spinal cord stimulation in England 2008-2012

Bharati Vyawahare<sup>1</sup>, Natalie Hallas<sup>2</sup>, Morag Brookes<sup>1</sup>, Rod S Taylor<sup>3</sup> & Sam Eldabe<sup>1</sup>

1. Department of Pain and Anaesthesia, James Cook University Hospital, Middlesbrough
2. Medtronic Limited UK, Watford, Hertfordshire
3. Institute of Health Research, University of Exeter Medical School, Exeter

## Abstract

**Background:** The National Institute for Health and Care Excellence (NICE) Technology Appraisal Guidance on spinal cord stimulation (SCS) was published in 2008 and updated in 2012 with no change. This guidance recommends SCS as a cost effective treatment for patients with neuropathic pain.

**Objective:** To assess the impact of NICE guidance by comparing SCS uptake in England pre- (2008-2009) and post- (2009-2012) NICE guidance. We also compared the English SCS uptake rate with Belgium, Netherlands, France and Germany.

**Design:** SCS implant data for England was obtained from the Hospital Episode Statistics database (HES) and compared with other European countries where comparable data were available.

**Results:** The HES data showed minimal increases in SCS implantation and replacement/revision procedures, and a large increase in SCS trials between 2008 and 2012. The increase in the total number of SCS procedures per million of population in England is driven primarily by revision/replacements and increased trial activity. Marked variability in SCS uptake at both health regions and primary care trust level was observed.

**Conclusion:** Despite the positive NICE recommendation for the routine use of SCS, we found no evidence of a significant impact on SCS uptake in England. Rates of SCS implantation in England are lower than many other European countries.

## Article Summary

### 1. Article Focus

- The NHS in England and Wales is legally obligated to fund NICE Technology Appraisal-approved technologies within 90 days. The NICE Technology Appraisal approving Spinal Cord Stimulation for Neuropathic Pain was published in 2008.
- We examined the impact of the NICE Technology Appraisal on the overall uptake of spinal cord stimulation in England, in addition to regional variations in patient access.

### 2. Key Messages

- The NICE Technology Appraisal publication appears to have had minimal impact on the uptake of spinal cord stimulation for new patients, and inequity of patient access remains despite clear evidence that this treatment is a cost-effective use of NHS resources.
- Reasons for this are multifactorial and include lack of guideline awareness, commissioning variation, lack of enforcement of NICE guidance and limited capacity at implanting centres.
- Some of these patient access barriers may be addressed with centralised commissioning of specialised services including spinal cord stimulation.

### 3. Strengths/limitations

- This study contributes a novel data analysis in the area of spinal cord stimulation, which highlights a lack of uptake of a cost-effective technology within the NHS.
- Our findings are based on data extracted from the Hospital Episodes Statistics database which relies on hospital coded data on procedures and indications.

## Introduction

The National Institute for Health and Care Excellence (NICE) is a Department of Health funded arms-length body, established in 1999 to principally reduce ‘the postcode lottery’ i.e. the variation in the availability and quality of NHS treatments and care in England and Wales(1, 2). NICE publishes various types of guidance including Technology Appraisals (TA), Clinical Guidelines, Quality Standards and Interventional Procedures Guidance (2). The TA guidance is based on evaluations of clinical and cost-effectiveness of selected technologies. The NHS is legally obliged to provide funding for medicines and treatments recommended within 3 months of the guidance (1). In December 2011, The Department of Health announced in its Innovation, Health and Wealth report that commissioners are expected to provide access to new treatments within 90 days of approval (1,3).

NICE TA guidance 159 on Spinal Cord Stimulation (SCS) for chronic pain of neuropathic or ischaemic origin was published in October 2008 and reviewed in January 2012 when no changes were made (4). This TA guidance approves SCS for adults with continued chronic neuropathic pain (measuring at least 50mm on 0-100mm visual analogue score) for at least 6 months despite all standard conventional treatment and after undergoing a successful trial of SCS by a multidisciplinary team (4).

We examined the data for SCS uptake in England between 2008 and 2012 in order to assess the impact of NICE TA guidance implementation. We compared this to the SCS implant rate in other European countries. Data was also requested from all Primary Care Trusts via a Freedom of Information request with regards to their SCS commissioning policy to determine whether a policy around the implementation of NICE guidance was in place or whether Individual Funding Requests (IFR) were being used.

## Methods

Data for pre- (2008-2009) and post- (2009-2010; 2010-2011; 2011-2012) NICE TA 159 publication for SCS procedural activity was obtained from the Hospital Episode Statistics (HES) database (5), using the QUANTIS system via NHiS (6). HES is a national statistical data warehouse for England of the care provided by NHS hospitals. QUANTIS is a database of NHS and social care numerical data for the UK and NHiS is a vendor that provides subscribed access to the QUANTIS database.

We examined OPCS-4 procedure codes A48.3 (Implantation of neurostimulator adjacent to spinal cord), A48.4 (Attention to neurostimulator adjacent to spinal cord) and A48.7 (Insertion of neurostimulator electrodes into spinal cord). The OPCS code A48.3 was assumed to reflect new permanent SCS implants, code A48.4 to contain both replacements and revisions, and code A48.7 to represent trial procedures. OPCS code 48.4 does not allow for a clear differentiation between battery replacement and revisions.

The relevant SCS codes were filtered by indication to ensure that only back pain and spinal indications were included. This eliminated any inclusion of other types of neurostimulation that may have been miscoded, for example for bowel and bladder indications. SCS uptake results are expressed per million populations across each Strategic Health Authority regions in England. We also compared uptake rates across Primary Care Trusts (PCT).

Oracle (11g Database) and Excel (Microsoft Office 2010 Pro) software programmes were utilised for the data analysis. We compared English SCS uptake data from 2011-12 (code A48.3 only) with European countries where we able to source the appropriate equivalent data, i.e. France, Belgium, Germany and the Netherlands (7).

## Results

The HES data analysis for year 2008-2012 showed a small increase in procedure codes 48.3 and 48.4 (Table 1a) and large increase in procedure code 48.7. Figure 2 illustrates the activity trends for each separate procedure code. On analysis of each of the procedure codes, the increase in SCS procedures appears to be driven primarily by replacements, revisions and a large increase in trial activity. There was considerable variation in the rate of SCS uptake across Strategic Health Authorities throughout this time horizon. The

1  
2  
3 breakdown of the number of SCS procedures funded by PCTs in 2011-12 is shown in  
4 Figure 3, indicating considerable inequity of patient access to this NICE-approved  
5 treatment.  
6  
7

8  
9  
10 Table 1b compares the available European data against procedure code 48.3, reflecting the  
11 number of new SCS implants only. In France there was a small increase in the number of  
12 SCS implants per million of population for the period 2008-2010 (Table 1b). The rate of  
13 uptake of SCS per million of population in England is the lowest compared to these other  
14 European countries (Table 1b).  
15  
16  
17

18  
19  
20 Figure 4 shows requested data from all Primary Care Trusts with regards to their SCS  
21 commissioning policy via a Freedom of Information request. The response rate was 60.9%,  
22 with 40.2% of PCTs requiring individual funding requests (IFR), 18.5% following a  
23 Specialised Commissioning Group policy, 15.2% following either PCT policy or with no  
24 active policy, and only 10.8% following NICE TA Guidance allowing automatic funding.  
25  
26  
27  
28  
29  
30  
31  
32  
33  
34  
35  
36  
37  
38  
39  
40  
41  
42  
43  
44  
45  
46  
47  
48  
49  
50  
51  
52  
53  
54  
55  
56  
57  
58  
59  
60

**Table 1a.** Total number of SCS procedures (combined A48.3 and A48.4 OPCS procedures) from 2008-2012.

| Regional SHA           | Population        | 2008 - 2009 |                 |                | 2009 - 2010 |                 |                | 2010 - 2011  |                 |                | 2011 - 2012  |                 |                |
|------------------------|-------------------|-------------|-----------------|----------------|-------------|-----------------|----------------|--------------|-----------------|----------------|--------------|-----------------|----------------|
|                        |                   | No. cases   | Cases / Million | 95% CI         | No. cases   | Cases / Million | 95% CI         | No. cases    | Cases / Million | 95% CI         | No. cases    | Cases / Million | 95% CI         |
| East Midlands          | 4,380,276         | 25          | 5.7             | 4 - 8          | 53          | 12.1            | 9 - 15         | 56           | 12.8            | 10 - 16        | 75           | 17.1            | 14 - 21        |
| East Of England        | 5,714,218         | 137         | 24.0            | 21 - 28        | 175         | 30.6            | 27 - 34        | 205          | 35.9            | 32 - 40        | 170          | 29.8            | 26 - 34        |
| London                 | 7,757,619         | 83          | 10.7            | 9 - 13         | 60          | 7.7             | 6 - 10         | 81           | 10.4            | 8 - 13         | 73           | 9.4             | 8 - 12         |
| North East             | 2,577,541         | 136         | 52.8            | 47 - 59        | 120         | 46.6            | 41 - 53        | 95           | 36.9            | 31 - 43        | 112          | 43.5            | 38 - 50        |
| North West             | 6,923,825         | 132         | 19.1            | 16 - 22        | 155         | 22.4            | 19 - 26        | 169          | 24.4            | 21 - 28        | 173          | 25.0            | 22 - 28        |
| South Central          | 4,069,352         | 20          | 4.9             | 3 - 7          | 39          | 9.6             | 7 - 13         | 44           | 10.8            | 8 - 14         | 38           | 9.3             | 7 - 13         |
| South East Coast       | 4,302,298         | 92          | 21.4            | 18 - 26        | 81          | 18.8            | 15 - 23        | 106          | 24.6            | 21 - 29        | 108          | 25.1            | 21 - 29        |
| South West             | 5,181,449         | 109         | 21.0            | 18 - 25        | 99          | 19.1            | 16 - 23        | 88           | 17.0            | 14 - 20        | 116          | 22.4            | 19 - 26        |
| West Midlands          | 5,421,595         | 50          | 9.2             | 7 - 12         | 53          | 9.8             | 8 - 13         | 45           | 8.3             | 6 - 11         | 43           | 7.9             | 6 - 11         |
| Yorkshire & the Humber | 5,244,956         | 123         | 23.5            | 20 - 27        | 133         | 25.4            | 22 - 29        | 172          | 32.8            | 29 - 37        | 174          | 33.2            | 29 - 37        |
| <b>Total</b>           | <b>51,573,129</b> | <b>907</b>  | <b>17.6</b>     | <b>17 - 19</b> | <b>968</b>  | <b>18.8</b>     | <b>18 - 20</b> | <b>1,061</b> | <b>20.6</b>     | <b>19 - 22</b> | <b>1,082</b> | <b>21.0</b>     | <b>20 - 22</b> |

1  
2  
3  
4  
5  
6  
7  
8  
9  
10  
11  
12  
13  
14  
15  
16  
17  
18  
19  
20  
21  
22  
23  
24  
25  
26  
27  
28  
29  
30  
31  
32  
33  
34  
35  
36  
37  
38  
39  
40  
41  
42  
43  
44  
45  
46  
47  
48  
49

**Table 1b.** Comparison of new SCS implants in UK (procedure code A48.3 only) against other European countries per year

| Country     | Yearly SCS/ Million |      |       |      |
|-------------|---------------------|------|-------|------|
|             | 2008                | 2009 | 2010  | 2011 |
| Belgium     |                     | 84.6 |       |      |
| France      | 9.19                | 8.17 | 11.35 |      |
| Netherlands |                     |      |       | 54.3 |
| Germany     |                     |      | 11.7  |      |
| UK(England) |                     |      | 11    | 10.7 |

Peer review only



1  
2  
3 *Place Figures 1- 4 here*  
4  
5

## 6 **Discussion**

7  
8 The NHS has a mandatory duty to fund and provide NICE-approved treatments  
9 recommended within a NICE TA within 90 days. However, our UK data analysis from  
10 2008 to 2012 shows that NICE TA 159 had minimal impact on uptake of SCS in  
11 neuropathic pain. Although an increase of 19.3% in SCS procedures was observed over the  
12 four year period, this figure includes battery replacements and revisions in addition to new  
13 SCS permanent implants. When new SCS implants are considered alone, an increase in  
14 uptake of only 12.4% percent was observed between 2008 and 2012 (Figure 2), despite the  
15 NICE TA 159 advocating a 10% increase in uptake each year. Interestingly the substantial  
16 rise in procedure code 48.7 (trial procedures) does not appear to convert into a comparable  
17 increase in permanent SCS procedures. Given that the conversion rate of trial to permanent  
18 SCS implants is generally consistent at around 75-80% (8), accuracy in provider coding in  
19 this instance may be questioned.  
20  
21  
22  
23  
24  
25  
26  
27

28  
29  
30 There remains considerable regional inequality in patient access to this NICE approved  
31 treatment. The Right Care (9) is one of the national work streams in the Department of  
32 Health (DH) Quality Innovation Productivity and Prevention programme (QIPP) which  
33 identifies unwarranted variation in NHS treatments based on geographical areas (9, 10).  
34 One of the Right Care objectives for 2011-2012 is to minimise this unwarranted variation  
35 and maximise value (9). Value can be increased by improving quality, optimising resource  
36 utilisation and ensuring that patients receive appropriate interventions.  
37  
38  
39  
40  
41  
42

43 Our findings are in contrast with a NICE implementation report (11) that shows a generally  
44 effective impact of guidance for surgical procedures. For example, laparoscopic colorectal  
45 surgeries occurred at higher rate than forecasted by NICE (TA 105) (12). Laparoscopic  
46 inguinal hernia repair uptake increased following guidance, but it stabilised at lower levels  
47 than NICE forecasted (TA 83) (13). In addition, there was overall increase in bariatric  
48 surgery for morbid obesity following NICE guidance (CG 43) (14). Our study provides  
49 data on the marked variability in rate of SCS uptake at both health authority and PCT level.  
50  
51  
52  
53  
54

55  
56 NICE assessed SCS as a highly cost-effective treatment for failed back surgery syndrome  
57 with an incremental £10,480 per quality adjusted life year (QALY) ratio compared with  
58  
59  
60

1  
2  
3 conventional medical management alone, and £9219 per QALY gained when compared  
4 with repeat back operation (4). These ratios are considerably below the UK willingness to  
5 pay threshold of £20,000 to 30,000 per QALY.  
6  
7

8  
9  
10 Despite mandatory TA guidance on SCS, the majority of PCTs required Individual  
11 Funding Requests (IFR) for each patient (Figure 4). Some PCTs rated SCS as a low  
12 priority procedure. The reasons for the barriers to funding are multifactorial and include  
13 lack of awareness of SCS referral guidelines, lack of NICE TAG enforcement at regional  
14 and national level, as well as a limitation of clinical capacity at implanting centres. Due to  
15 the limitations of the available data it is not possible to disentangle the factors responsible  
16 for the continuing inequity of funding for SCS implants. Yet we can comment that there  
17 has been no significant increase in the number of implanting centres. The capacity within  
18 existing centres is not showing a growth curve as expected in response to the NICE  
19 guidance. Only 10.8% of PCTs implemented NICE guidance as a funding policy (Figure  
20 4). It is possible that piecemeal funding and the difficulties associated with such an  
21 approach, as well as the impact of the marked regional variations, have prevented the  
22 expansion of current providers. The reported incidence of failed back surgery syndrome is  
23 estimated as 10-40% of patients undergoing back surgery (15). In recent survey of the  
24 United Kingdom, 53% of pain clinics estimated 10% of their referrals comprised of failed  
25 back surgery syndrome patients and the remaining 47% of pain clinics estimated it as 20-  
26 30% of their referrals, therefore lack of candidates is unlikely (16).  
27  
28  
29  
30  
31  
32  
33  
34  
35  
36  
37  
38  
39

40 In a comparison to France, Germany, Belgium and the Netherlands, England has the lowest  
41 rate of implants per million of the population. Smaller countries show a much higher rate  
42 of SCS implants (7), with Belgium and the Netherlands implanting 84.6 and 54.3 per  
43 million of population respectively. Nevertheless, for Belgium and the Netherlands only one  
44 year of data is available therefore we are unable to comment on trends. Data for France  
45 was available for the last three years (Table 1b) and shows no significant increase in SCS  
46 implants. The main indications for SCS are similar across the four countries i.e. failed  
47 back surgery syndrome or radicular pain, phantom pain, peripheral nerve injury, traumatic  
48 brachial plexus injury, spinal lesion, diabetic polyneuropathy and post herpetic neuralgia  
49 (7). Focusing on the most common indication for SCS of failed back surgery syndrome, it  
50 is estimated that 10-40% of patients undergoing spinal surgery will develop neuropathic  
51 pain (15). According to HES database, the number of spinal surgery procedures in England  
52  
53  
54  
55  
56  
57  
58  
59  
60

1  
2  
3 in 2009-2010 was 117,803 (17). Assuming that one third of these procedures is being  
4 carried out for pain, the annual estimate will be 78,533 procedures of which 10% to 40 %  
5 (7,853 to 31,414) would be expected to be eligible for SCS treatment (16). Based on this  
6 data, less than 2% of the eligible population of neuropathic patients in England are  
7 currently receiving SCS treatment.  
8  
9  
10

### 11 12 13 **Conclusion**

14 Our study shows that NICE TA 159 has had minimal impact on the uptake of SCS for new  
15 patients, and rates of SCS implantation were highly variable across Strategic Health  
16 Authorities and PCTs. The reasons for the lack of impact appear to be multifactorial.  
17 Within the new arrangements of NHS England, where SCS is deemed to be a prescribed  
18 specialised service that will be commissioned centrally, some of these barriers may be  
19 addressed including a shift towards more equitable access to this technology, and  
20 elimination of the use of Individual Funding Requests. Future implementation of NICE  
21 Innovation Scorecards to track compliance with NICE Technology Appraisals and other  
22 NICE compliance initiatives may further help to reinforce and track the implementation of  
23 NICE guidance.  
24  
25  
26  
27  
28  
29  
30  
31  
32  
33  
34

### 35 **Figure Legends**

36  
37 Figure 1. No. of SCS implanting centres year on year

38  
39 Figure 2. Breakdown of SCS procedural activity trends (procedure codes A48.3, A48.4,  
40 and A48.7)

41  
42 Figure 3. Number of total SCS procedures per PCT in 2011-12

43  
44 Figure 4. Data from Freedom of Information request regarding PCT policies on SCS (data  
45 accessed 2011)  
46  
47

### 48 **Contributorship Statement:**

49 All authors had an integral role in producing this manuscript and have made substantial  
50 contributions to the analysis and interpretation of data; drafting and revision of the article;  
51 and approving the final version of the manuscript.  
52  
53  
54

55 **Funding statement:** Access to the QUANTIS database to extract the relevant Hospital  
56 Episode Statistics data was funded by Medtronic UK. The planning, conduct and  
57 conclusions of this report are those of the authors and not the company.  
58  
59  
60

1  
2  
3  
4  
5  
6  
7  
8  
9  
10  
11  
12  
13  
14  
15  
16  
17  
18  
19  
20  
21  
22  
23  
24  
25  
26  
27  
28  
29  
30  
31  
32  
33  
34  
35  
36  
37  
38  
39  
40  
41  
42  
43  
44  
45  
46  
47  
48  
49  
50  
51  
52  
53  
54  
55  
56  
57  
58  
59  
60

**Competing interests statement:** Rod Taylor is a paid consultant for Medtronic Inc. Sam Eldabe has previously undertaken consulting work for Medtronic Inc.

For peer review only

**References:**

1. Sorenson C, Drummond M, Kanavos P, McGuire A. National Institute for Health and Clinical Excellence (NICE): How does it work and what are the implications for the U.S.? 2008 [updated April 2008]. Available from: [www.npcnow.org/issuearea/ebm.asp](http://www.npcnow.org/issuearea/ebm.asp).
2. N.I.C.E. How we work [updated 13 July 2012]. Available from: [http://www.nice.org.uk/aboutnice/howwework/how\\_we\\_work.jsp](http://www.nice.org.uk/aboutnice/howwework/how_we_work.jsp).
3. D.O.H. Creating Change: Innovating Health and Wealth One Year On. Health Do; 2011.
4. N.I.C.E. Technology Appraisal Guidelines 159: Spinal cord stimulation for chronic pain of neuropathic or ischaemic origin 2008 [updated Oct 2008]. Available from: [www.nice.org.uk/TA159](http://www.nice.org.uk/TA159).
5. Hospital Episode Statistics [cited 2013]. Available from: [www.hesonline.nhs.uk/](http://www.hesonline.nhs.uk/).
6. NHIS. Available from: <http://www.nhis.info/>.
7. Camberlin C, San Miguel L, Smit Y, Post P, Gerken S, De Laet C. KCE Report 189C: Health Technology Assessment. Neuromodulation for the management of chronic pain: Implanted spinal cord stimulators and intrathecal analgesic delivery pumps. In: Centre BHCK, editor. Brussels2012.
8. North RB. SCS Trial Duration. Neuromodulation: Technology at the Neural Interface. 2003;6(1):4-5.
9. NHS Rightcare 2013 [updated 2013]. Available from: <http://www.rightcare.nhs.uk/resources>.
10. NHS Rightcare Atlas 2013 [cited 2013 04Apr13]. Available from: <http://www.rightcare.nhs.uk/atlas>.
11. N.I.C.E. NICE implementation programme 2012 [updated 14 November 2012]. Available from: [http://www.nice.org.uk/usingguidance/niceimplementationprogramme/nice\\_implementation\\_programme.jsp](http://www.nice.org.uk/usingguidance/niceimplementationprogramme/nice_implementation_programme.jsp).
12. N.I.C.E. NICE Implementation uptake report: Laparoscopic surgery for colorectal cancer. NICE Technology Appraisal 105. In: Excellence NIoHaC, editor. 2010.
13. N.I.C.E. Laparoscopic surgery for inguinal hernia repair: Implementation Uptake Report. Technology Appraisal 83. In: Excellence NifHaC, editor. 2004.
14. N.I.C.E. Obesity guidance on the prevention, identification, assessment and management of overweight and obesity in adults and children. Clinical Guidance CG43. In: Excellence NifHaC, editor. 2006.
15. Thomson S, Jacques L. Demographic Characteristics of Patients with Severe Neuropathic Pain Secondary to Failed Back Surgery Syndrome. Pain Pract. 2009;9(3):206-15.
16. Tharmanathan P, Adamson J, Ashby R, Eldabe S. Diagnosis and treatment of failed back surgery syndrome in the UK: mapping of practice using a cross-sectional survey. British Journal of Pain. 2012;6(4):142-52.
17. Mailis-Gagnon A, Furlan AD, Sandoval JA, Taylor R. Spinal cord stimulation for chronic pain. Cochrane Database Syst Rev. 2004 (3):CD003783. PubMed PMID: 15266501.

1  
2  
3  
4  
5  
6  
7  
8  
9  
10  
11  
12  
13  
14  
15  
16  
17  
18  
19  
20  
21  
22  
23  
24  
25  
26  
27  
28  
29  
30  
31  
32  
33  
34  
35  
36  
37  
38  
39  
40  
41  
42  
43  
44  
45  
46  
47  
48  
49  
50  
51  
52  
53  
54  
55  
56  
57  
58  
59  
60

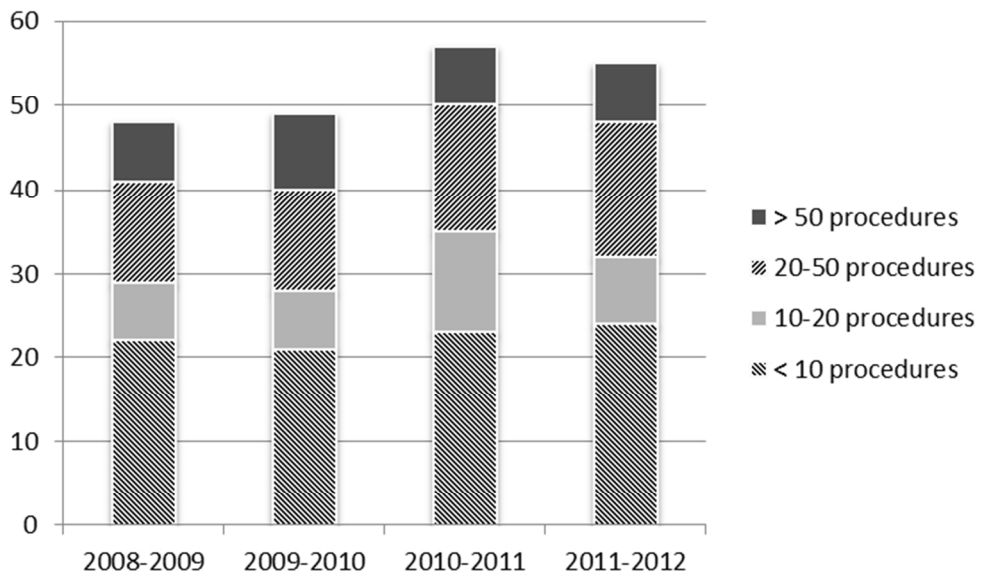

No. of SCS implanting centres year on year  
196x116mm (96 x 96 DPI)

review only

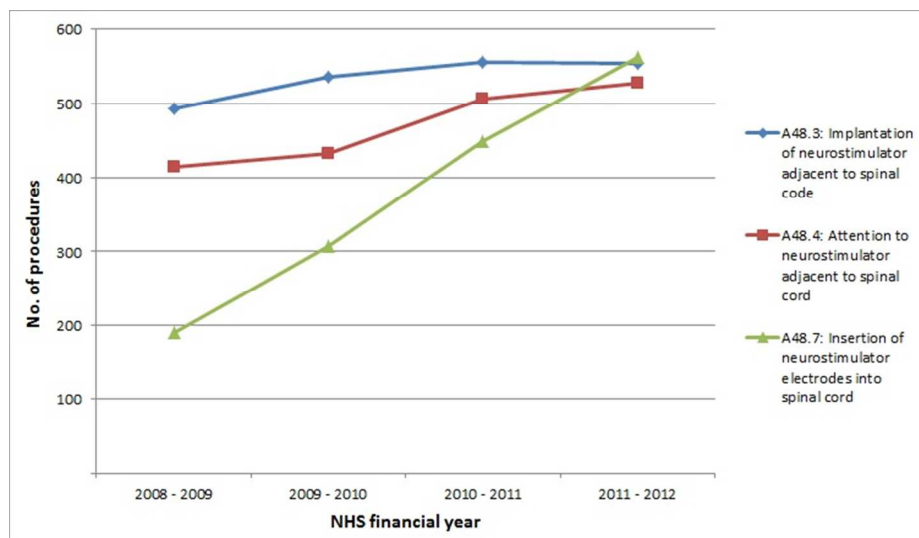

Breakdown of SCS procedural activity trends (procedure codes A48.3, A48.4, and A48.7)  
216x121mm (96 x 96 DPI)

review only

1  
2  
3  
4  
5  
6  
7  
8  
9  
10  
11  
12  
13  
14  
15  
16  
17  
18  
19  
20  
21  
22  
23  
24  
25  
26  
27  
28  
29  
30  
31  
32  
33  
34  
35  
36  
37  
38  
39  
40  
41  
42  
43  
44  
45  
46  
47  
48  
49  
50  
51  
52  
53  
54  
55  
56  
57  
58  
59  
60

1  
2  
3  
4  
5  
6  
7  
8  
9  
10  
11  
12  
13  
14  
15  
16  
17  
18  
19  
20  
21  
22  
23  
24  
25  
26  
27  
28  
29  
30  
31  
32  
33  
34  
35  
36  
37  
38  
39  
40  
41  
42  
43  
44  
45  
46  
47  
48  
49  
50  
51  
52  
53  
54  
55  
56  
57  
58  
59  
60

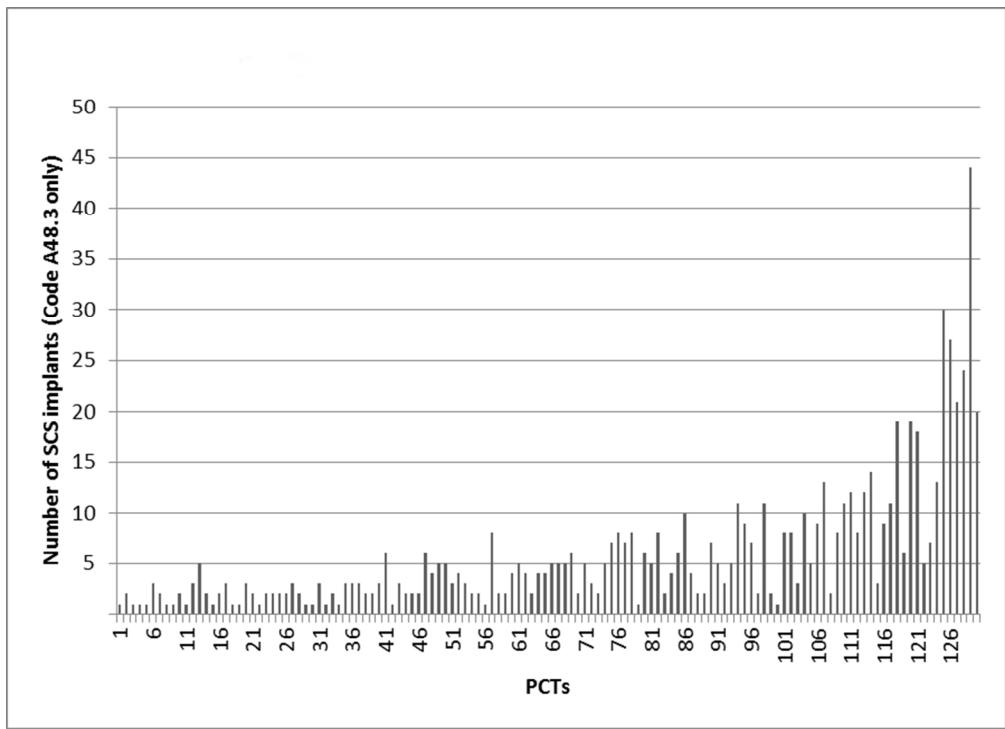

Number of total SCS procedures per PCT in 2011-12  
237x171mm (96 x 96 DPI)

View only



1  
2  
3  
4  
5  
6  
7  
8  
9  
10  
11  
12  
13  
14  
15  
16  
17  
18  
19  
20  
21  
22  
23  
24  
25  
26  
27  
28  
29  
30  
31  
32  
33  
34  
35  
36  
37  
38  
39  
40  
41  
42  
43  
44  
45  
46  
47  
48  
49  
50  
51  
52  
53  
54  
55  
56  
57  
58  
59  
60

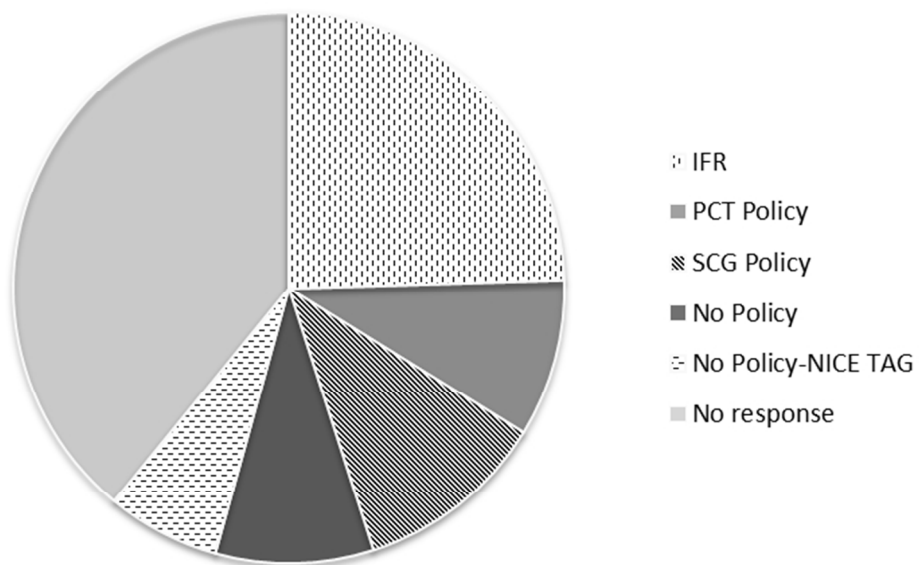

Data from Freedom of Information request regarding PCT policies on SCS (data accessed 2011)  
197x118mm (96 x 96 DPI)

review only



**Impact of National Institute for Health and Care Excellence (NICE) guidance on medical technology uptake: Analysis of the uptake of spinal cord stimulation in England 2008-2012**

|                                 |                                                                                                                                                                                                                                                                                                                                                                                  |
|---------------------------------|----------------------------------------------------------------------------------------------------------------------------------------------------------------------------------------------------------------------------------------------------------------------------------------------------------------------------------------------------------------------------------|
| Journal:                        | <i>BMJ Open</i>                                                                                                                                                                                                                                                                                                                                                                  |
| Manuscript ID:                  | bmjopen-2013-004182.R1                                                                                                                                                                                                                                                                                                                                                           |
| Article Type:                   | Research                                                                                                                                                                                                                                                                                                                                                                         |
| Date Submitted by the Author:   | 13-Nov-2013                                                                                                                                                                                                                                                                                                                                                                      |
| Complete List of Authors:       | Vyawahare, Bharati; James Cook University Hospital, Department of Pain and Anaesthesia<br>Hallas, Natalie; Medtronic UK, Neuromodulation<br>Brookes, Morag; James Cook University Hospital, Department of Pain and Anaesthesia<br>Taylor, Rod; University of Exeter, Peninsula Medical School<br>Eldabe, Sam; James Cook University Hospital, Department of Pain and Anaesthesia |
| <b>Primary Subject Heading</b>: | Health policy                                                                                                                                                                                                                                                                                                                                                                    |
| Secondary Subject Heading:      | Anaesthesia, Health economics, Neurology                                                                                                                                                                                                                                                                                                                                         |
| Keywords:                       | Pain management < ANAESTHETICS, Health economics < HEALTH SERVICES ADMINISTRATION & MANAGEMENT, Health policy < HEALTH SERVICES ADMINISTRATION & MANAGEMENT, Neurological pain < NEUROLOGY, PAIN MANAGEMENT                                                                                                                                                                      |
|                                 |                                                                                                                                                                                                                                                                                                                                                                                  |

SCHOLARONE™  
Manuscripts

1  
2  
3  
4 **Impact of National Institute for Health and Care Excellence**  
5  
6 **(NICE) guidance on medical technology uptake: Analysis of the**  
7  
8 **uptake of spinal cord stimulation in England 2008-2012**  
9

10 Bharati Vyawahare<sup>1</sup>, Natalie Hallas<sup>2</sup>, Morag Brookes<sup>1</sup>, Rod S Taylor<sup>3</sup> & Sam Eldabe<sup>1</sup>

- 11  
12 1. Department of Pain and Anaesthesia, James Cook University Hospital, Middlesbrough  
13  
14 2. Medtronic Limited UK, Watford, Hertfordshire  
15  
16 3. Institute of Health Research, University of Exeter Medical School, Exeter  
17  
18  
19  
20  
21  
22  
23  
24  
25  
26  
27  
28  
29  
30  
31  
32  
33  
34  
35  
36  
37  
38  
39  
40  
41  
42  
43  
44  
45  
46  
47  
48  
49  
50  
51  
52  
53  
54  
55  
56  
57  
58  
59  
60

## Abstract

**Background:** The National Institute for Health and Care Excellence (NICE) Technology Appraisal Guidance on spinal cord stimulation (SCS) was published in 2008 and updated in 2012 with no change. This guidance recommends SCS as a cost effective treatment for patients with neuropathic pain.

**Objective:** To assess the impact of NICE guidance by comparing SCS uptake in England pre- (2008-2009) and post- (2009-2012) NICE guidance. We also compared the English SCS uptake rate with Belgium, Netherlands, France and Germany.

**Design:** SCS implant data for England was obtained from the Hospital Episode Statistics database (HES) and compared with other European countries where comparable data were available.

**Results:** The HES data showed small increases in SCS implantation and replacement/revision procedures, and a large increase in SCS trials between 2008 and 2012. The increase in the total number of SCS procedures per million of population in England is driven primarily by revision/replacements and increased trial activity. Marked variability in SCS uptake at both health regions and primary care trust level was observed.

**Conclusion:** Despite the positive NICE recommendation for the routine use of SCS, we found no evidence of a significant impact on SCS uptake in England. Rates of SCS implantation in England are lower than many other European countries.

## Article Summary

### 1. Article Focus

- The NHS in England and Wales is legally obligated to fund NICE Technology Appraisal-approved technologies within 90 days. The NICE Technology Appraisal approving Spinal Cord Stimulation for Neuropathic Pain was published in 2008.
- We examined the impact of the NICE Technology Appraisal on the overall uptake of spinal cord stimulation in England, in addition to regional variations in patient access.

### 2. Key Messages

- The NICE Technology Appraisal publication appears to have had negligible impact on the uptake of spinal cord stimulation for new patients, and inequity of patient access remains despite clear evidence that this treatment is a cost-effective use of NHS resources.
- Reasons for this are multifactorial and include lack of guideline awareness, commissioning variation, lack of enforcement of NICE guidance and limited capacity at implanting centres.
- Some of these patient access barriers may be addressed with centralised commissioning of specialised services including spinal cord stimulation.

### 3. Strengths/limitations

- This study contributes a novel data analysis in the area of spinal cord stimulation, which highlights a lack of uptake of a cost-effective technology within the NHS.
- Our findings are based on data extracted from the Hospital Episodes Statistics database which relies on hospital coded data on procedures and indications.

## Introduction

The National Institute for Health and Care Excellence (NICE) is a Department of Health funded arms-length body, established in 1999 to principally reduce ‘the postcode lottery’ i.e. the variation in the availability and quality of NHS treatments and care in England and Wales(1, 2). NICE publishes various types of guidance including Technology Appraisals (TA), Clinical Guidelines, Quality Standards and Interventional Procedures Guidance (2). The TA guidance is based on evaluations of clinical and cost-effectiveness of selected technologies. The NHS is legally obliged to provide funding for medicines and treatments recommended within 3 months of the guidance (1). In December 2011, The Department of Health announced in its Innovation, Health and Wealth report that commissioners are expected to provide access to new treatments within 90 days of approval (1,3).

NICE TA guidance 159 on Spinal Cord Stimulation (SCS) for chronic pain of neuropathic or ischaemic origin was published in October 2008 and reviewed in January 2012 when no changes were made (4). This TA guidance approves SCS for adults with continued chronic neuropathic pain (measuring at least 50mm on 0-100mm visual analogue score) for at least 6 months despite all standard conventional treatment and after undergoing a successful trial of SCS by a multidisciplinary team (4).

We examined the data for SCS uptake in England between 2008 and 2012 in order to assess the impact of NICE TA guidance implementation. We compared this to the SCS implant rate in other European countries. Data was also requested from all Primary Care Trusts via a Freedom of Information request with regards to their SCS commissioning policy to determine whether a policy around the implementation of NICE guidance was in place or whether Individual Funding Requests (IFR) were being used.

## Methods

Data for pre- (2008-2009) and post- (2009-2010; 2010-2011; 2011-2012) NICE TA 159 publication for SCS procedural activity was obtained from the Hospital Episode Statistics (HES) database (5), using the QUANTIS system via NHiS (6). HES is a national statistical data warehouse for England of the care provided by NHS hospitals. QUANTIS is a database of NHS and social care numerical data for the UK and NHiS is a vendor that provides subscribed access to the QUANTIS database.

We examined OPCS-4 procedure codes A48.3 (Implantation of neurostimulator adjacent to spinal cord), A48.4 (Attention to neurostimulator adjacent to spinal cord) and A48.7 (Insertion of neurostimulator electrodes into spinal cord). The OPCS code A48.3 was assumed to reflect new permanent SCS implants, code A48.4 to contain both replacements and revisions, and code A48.7 to represent trial procedures. OPCS code 48.4 does not allow for a clear differentiation between battery replacement and revisions.

The relevant SCS codes were filtered by indication to ensure that only back pain and spinal indications were included. This eliminated any inclusion of other types of neurostimulation that may have been miscoded, for example for bowel and bladder indications. SCS uptake results are expressed per million populations across each Strategic Health Authority regions in England. We also compared uptake rates across Primary Care Trusts (PCT).

Oracle (11g Database) and Excel (Microsoft Office 2010 Pro) software programmes were utilised for the data analysis. We compared English SCS uptake data from 2011-12 (code A48.3 only) with European countries where we able to source the appropriate equivalent data, i.e. France, Belgium, Germany and the Netherlands (7).

## Results

The HES data analysis for year 2008-2012 showed a small increase in procedure codes 48.3 and 48.4 (Table 1a) and large increase in procedure code 48.7. Figure 2 illustrates the activity trends for each separate procedure code. On analysis of each of the procedure codes, the increase in SCS procedures appears to be driven primarily by replacements, revisions and a large increase in trial activity. There was considerable variation in the rate of SCS uptake across Strategic Health Authorities throughout this time horizon. The

1  
2  
3 breakdown of the number of SCS procedures funded by PCTs in 2011-12 is shown in  
4 Figure 3, indicating considerable inequity of patient access to this NICE-approved  
5 treatment.  
6  
7

8  
9  
10 Table 1b compares the available European data against procedure code 48.3, reflecting the  
11 number of new SCS implants only. In France there was a small increase in the number of  
12 SCS implants per million of population for the period 2008-2010 (Table 1b). The rate of  
13 uptake of SCS per million of population in England is the lowest compared to these other  
14 European countries (Table 1b).  
15  
16  
17

18  
19  
20 Figure 4 shows requested data from all Primary Care Trusts with regards to their SCS  
21 commissioning policy via a Freedom of Information request. The response rate was 60.9%,  
22 with 40.2% of PCTs requiring individual funding requests (IFR), 18.5% following a  
23 Specialised Commissioning Group (SCG) policy, 15.2% following either PCT policy or  
24 with no active policy, and only 10.8% following NICE TA Guidance allowing automatic  
25 funding. Whilst the level of data did not allow a statistical analysis of the correlation  
26 between the PCT policy status and the number of SCS procedures funded, some evidence  
27 of an association between regions with an existing policy and the number of patients being  
28 funded for SCS was apparent. For example, across Yorkshire and the Humber, where a  
29 clear SCG policy was being followed by the collective PCTs, a high rate of SCS  
30 procedures was observed at 33.2 cases per million (Table 1a). This was also evident with  
31 the East of England (29.8 procedures per million). Conversely, the lowest rates of SCS  
32 referrals were reported in regions with no PCT or SCG policy in place, such as the West  
33 Midlands and London (7.9 and 9.4 procedures per million, respectively).  
34  
35  
36  
37  
38  
39  
40  
41  
42  
43  
44  
45  
46  
47  
48  
49  
50  
51  
52  
53  
54  
55  
56  
57  
58  
59  
60



1  
2  
3  
4  
5  
6  
7  
8  
9  
10  
11  
12  
13  
14  
15  
16  
17  
18  
19  
20  
21  
22  
23  
24  
25  
26  
27  
28  
29  
30  
31  
32  
33  
34  
35  
36  
37  
38  
39  
40  
41  
42  
43  
44  
45  
46  
47  
48  
49

**Table 1a.** Total number of SCS procedures (combined A48.3 and A48.4 OPCS procedures) from 2008-2012.

| Regional SHA           | Population        | 2008 - 2009 |                 |                | 2009 - 2010 |                 |                | 2010 - 2011  |                 |                | 2011 - 2012  |                 |                |
|------------------------|-------------------|-------------|-----------------|----------------|-------------|-----------------|----------------|--------------|-----------------|----------------|--------------|-----------------|----------------|
|                        |                   | No. cases   | Cases / Million | 95% CI         | No. cases   | Cases / Million | 95% CI         | No. cases    | Cases / Million | 95% CI         | No. cases    | Cases / Million | 95% CI         |
| East Midlands          | 4,380,276         | 25          | 5.7             | 4 - 8          | 53          | 12.1            | 9 - 15         | 56           | 12.8            | 10 - 16        | 75           | 17.1            | 14 - 21        |
| East Of England        | 5,714,218         | 137         | 24.0            | 21 - 28        | 175         | 30.6            | 27 - 34        | 205          | 35.9            | 32 - 40        | 170          | 29.8            | 26 - 34        |
| London                 | 7,757,619         | 83          | 10.7            | 9 - 13         | 60          | 7.7             | 6 - 10         | 81           | 10.4            | 8 - 13         | 73           | 9.4             | 8 - 12         |
| North East             | 2,577,541         | 136         | 52.8            | 47 - 59        | 120         | 46.6            | 41 - 53        | 95           | 36.9            | 31 - 43        | 112          | 43.5            | 38 - 50        |
| North West             | 6,923,825         | 132         | 19.1            | 16 - 22        | 155         | 22.4            | 19 - 26        | 169          | 24.4            | 21 - 28        | 173          | 25.0            | 22 - 28        |
| South Central          | 4,069,352         | 20          | 4.9             | 3 - 7          | 39          | 9.6             | 7 - 13         | 44           | 10.8            | 8 - 14         | 38           | 9.3             | 7 - 13         |
| South East Coast       | 4,302,298         | 92          | 21.4            | 18 - 26        | 81          | 18.8            | 15 - 23        | 106          | 24.6            | 21 - 29        | 108          | 25.1            | 21 - 29        |
| South West             | 5,181,449         | 109         | 21.0            | 18 - 25        | 99          | 19.1            | 16 - 23        | 88           | 17.0            | 14 - 20        | 116          | 22.4            | 19 - 26        |
| West Midlands          | 5,421,595         | 50          | 9.2             | 7 - 12         | 53          | 9.8             | 8 - 13         | 45           | 8.3             | 6 - 11         | 43           | 7.9             | 6 - 11         |
| Yorkshire & the Humber | 5,244,956         | 123         | 23.5            | 20 - 27        | 133         | 25.4            | 22 - 29        | 172          | 32.8            | 29 - 37        | 174          | 33.2            | 29 - 37        |
| <b>Total</b>           | <b>51,573,129</b> | <b>907</b>  | <b>17.6</b>     | <b>17 - 19</b> | <b>968</b>  | <b>18.8</b>     | <b>18 - 20</b> | <b>1,061</b> | <b>20.6</b>     | <b>19 - 22</b> | <b>1,082</b> | <b>21.0</b>     | <b>20 - 22</b> |

**Table 1b.** Comparison of new SCS implants in UK (procedure code A48.3 only) against other European countries per year

| Country     | Yearly SCS/ Million |      |       |      |
|-------------|---------------------|------|-------|------|
|             | 2008                | 2009 | 2010  | 2011 |
| Belgium     |                     | 84.6 |       |      |
| France      | 9.19                | 8.17 | 11.35 |      |
| Netherlands |                     |      |       | 54.3 |
| Germany     |                     |      | 11.7  |      |
| UK(England) |                     |      | 11    | 10.7 |

1  
2  
3 *Place Figures 1- 4 here*  
4  
5

## 6 **Discussion**

7  
8 The NHS has a mandatory duty to fund and provide NICE-approved treatments  
9 recommended within a NICE TA within 90 days. However, our UK data analysis from  
10 2008 to 2012 shows that NICE TA 159 had a small impact on uptake of SCS in  
11 neuropathic pain. Although an increase of 19.3% in SCS procedures was observed over the  
12 four year period, this figure 1 includes battery replacements and revisions in addition to  
13 new SCS permanent implants. When new SCS implants are considered alone, an increase  
14 in uptake of only 12.4% percent was observed between 2008 and 2012 (Figure 2), despite  
15 the NICE TA 159 advocating a 10% increase in uptake each year. Interestingly the  
16 substantial rise in procedure code 48.7 (trial procedures) does not appear to convert into a  
17 comparable increase in permanent SCS procedures. Given that the conversion rate of trial  
18 to permanent SCS implants is generally consistent at around 75-80% (8), accuracy in  
19 provider coding in this instance may be questioned.  
20  
21  
22  
23  
24  
25  
26  
27  
28

29  
30 There remains considerable regional inequality in patient access to this NICE approved  
31 treatment. The Right Care (9) is one of the national work streams in the Department of  
32 Health (DH) Quality Innovation Productivity and Prevention programme (QIPP) which  
33 identifies unwarranted variation in NHS treatments based on geographical areas (9, 10).  
34 One of the Right Care objectives for 2011-2012 is to minimise this unwarranted variation  
35 and maximise value (9). Value can be increased by improving quality, optimising resource  
36 utilisation and ensuring that patients receive appropriate interventions.  
37  
38  
39  
40  
41  
42

43 Our findings are in contrast with a NICE implementation report (11) that shows a generally  
44 effective impact of guidance for surgical procedures. For example, laparoscopic colorectal  
45 surgeries occurred at higher rate than forecasted by NICE (TA 105) (12). Laparoscopic  
46 inguinal hernia repair uptake increased following guidance, but it stabilised at lower levels  
47 than NICE forecasted (TA 83) (13). In addition, there was overall increase in bariatric  
48 surgery for morbid obesity following NICE guidance (CG 43) (14). Our study provides  
49 data on the marked variability in rate of SCS uptake at both health authority and PCT level.  
50  
51  
52  
53  
54

55  
56 NICE assessed SCS as a highly cost-effective treatment for failed back surgery syndrome  
57 with an incremental £10,480 per quality adjusted life year (QALY) ratio compared with  
58  
59  
60

1  
2  
3 conventional medical management alone, and £9219 per QALY gained when compared  
4 with repeat back operation (4). These ratios are considerably below the UK willingness to  
5 pay threshold of £20,000 to 30,000 per QALY.  
6  
7

8  
9  
10 Despite mandatory TA guidance on SCS, the majority of PCTs required Individual  
11 Funding Requests (IFR) for each patient (Figure 4). Some PCTs rated SCS as a low  
12 priority procedure. The reasons for the barriers to funding are multifactorial and include  
13 lack of awareness of SCS referral guidelines, lack of NICE TAG enforcement at regional  
14 and national level, as well as a limitation of clinical capacity at implanting centres. Due to  
15 the limitations of the available data it is not possible to disentangle the factors responsible  
16 for the continuing inequity of funding for SCS implants. Yet we can comment that there  
17 has been no significant increase in the number of implanting centres. The capacity within  
18 existing centres is not showing a growth curve as expected in response to the NICE  
19 guidance. Only 10.8% of PCTs implemented NICE guidance as a funding policy (Figure  
20 4). It is possible that piecemeal funding and the difficulties associated with such an  
21 approach, as well as the impact of the marked regional variations, have prevented the  
22 expansion of current providers. The reported incidence of failed back surgery syndrome is  
23 estimated as 10-40% of patients undergoing back surgery (15). In recent survey of the  
24 United Kingdom, 53% of pain clinics estimated 10% of their referrals comprised of failed  
25 back surgery syndrome patients and the remaining 47% of pain clinics estimated it as 20-  
26 30% of their referrals, therefore lack of candidates is unlikely (16).  
27  
28  
29  
30  
31  
32  
33  
34  
35  
36  
37  
38  
39

40 In a comparison to France, Germany, Belgium and the Netherlands, England has the lowest  
41 rate of implants per million of the population. Smaller countries show a much higher rate  
42 of SCS implants (7), with Belgium and the Netherlands implanting 84.6 and 54.3 per  
43 million of population respectively. Nevertheless, for Belgium and the Netherlands only one  
44 year of data is available therefore we are unable to comment on trends. Data for France  
45 was available for the last three years (Table 1b) and shows no significant increase in SCS  
46 implants. The main indications for SCS are similar across the four countries i.e. failed  
47 back surgery syndrome or radicular pain, phantom pain, peripheral nerve injury, traumatic  
48 brachial plexus injury, spinal lesion, diabetic polyneuropathy and post herpetic neuralgia  
49 (7). Focusing on the most common indication for SCS of failed back surgery syndrome, it  
50 is estimated that 10-40% of patients undergoing spinal surgery will develop neuropathic  
51 pain (15). According to HES database, the number of spinal surgery procedures in England  
52  
53  
54  
55  
56  
57  
58  
59  
60

1  
2  
3 in 2009-2010 was 117,803 (17). Assuming that one third of these procedures is being  
4 carried out for pain, the annual estimate will be 78,533 procedures of which 10% to 40 %  
5 (7,853 to 31,414) would be expected to be eligible for SCS treatment (16). Based on this  
6 data, less than 2% of the eligible population of neuropathic patients in England are  
7 currently receiving SCS treatment. A lack of awareness of SCS as a clinical and cost-  
8 effective treatment option amongst referring physicians may be hindering the uptake of this  
9 NICE-approved technology. More constructive engagement with the wider population of  
10 patients and referring physicians by the neuromodulation community is warranted to  
11 ensure appropriate and early referral for SCS therapy.  
12  
13  
14  
15  
16  
17  
18  
19

## 20 **Conclusion**

21 Our study shows that NICE TA 159 has had negligible impact on the uptake of SCS for  
22 new patients, and rates of SCS implantation were highly variable across Strategic Health  
23 Authorities and PCTs. The reasons for the lack of impact appear to be multifactorial and  
24 may include limited awareness of SCS as an clinical and cost-effective treatment option  
25 amongst the wider referral community. Within the new arrangements of NHS England,  
26 where SCS is deemed to be a prescribed specialised service that will be commissioned  
27 centrally, some of these barriers may be addressed including a shift towards more equitable  
28 access to this technology, and elimination of the use of Individual Funding Requests.  
29 Future implementation of NICE Innovation Scorecards to track compliance with NICE  
30 Technology Appraisals and other NICE compliance initiatives may further help to  
31 reinforce and track the implementation of NICE guidance.  
32  
33  
34  
35  
36  
37  
38  
39  
40  
41  
42  
43

## 44 **Figure Legends**

45  
46 Figure 1. No. of SCS implanting centres year on year

47  
48 Figure 2. Breakdown of SCS procedural activity trends (procedure codes A48.3, A48.4,  
49 and A48.7)

50  
51 Figure 3. Number of total SCS procedures per PCT in 2011-12

52  
53 Figure 4. Data from Freedom of Information request regarding PCT policies on SCS (data  
54 accessed 2011)  
55  
56  
57  
58  
59  
60

**Contributorship Statement:** All authors had an integral role in producing this manuscript and have made substantial contributions to the analysis and interpretation of data; drafting and revision of the article; and approving the final version of the manuscript.

**Funding statement:** Access to the QUANTIS database to extract the relevant Hospital Episode Statistics data was funded by Medtronic UK. The planning, conduct and conclusions of this report are those of the authors and not the company.

**Competing interests statement:** Rod Taylor is a paid consultant for Medtronic Inc. Sam Eldabe has previously undertaken consulting work for Medtronic Inc.

**Data sharing:** Readers are invited to contact the corresponding author, Natalie Hallas, if they wish to request any raw unpublished Hospital Episodes Statistics data pertaining to the manuscript.

### References:

1. Sorenson C, Drummond M, Kanavos P, et al. National Institute for Health and Clinical Excellence (NICE): How does it work and what are the implications for the U.S.? 2008 [updated April 2008]. Available from: [www.npcnow.org/issuearea/ebm.asp](http://www.npcnow.org/issuearea/ebm.asp).
2. N.I.C.E. How we work [updated 13 July 2012]. Available from: [http://www.nice.org.uk/aboutnice/howwework/how\\_we\\_work.jsp](http://www.nice.org.uk/aboutnice/howwework/how_we_work.jsp).
3. D.O.H. Creating Change: Innovating Health and Wealth One Year On. Health Do; 2011.
4. N.I.C.E. Technology Appraisal Guidelines 159: Spinal cord stimulation for chronic pain of neuropathic or ischaemic origin 2008 [updated Oct 2008]. Available from: [www.nice.org.uk/TA159](http://www.nice.org.uk/TA159).
5. Hospital Episode Statistics [cited 2013]. Available from: [www.hesonline.nhs.uk/](http://www.hesonline.nhs.uk/).
6. NHIS. Available from: <http://www.nhis.info/>.
7. Camberlin C, San Miguel L, Smit Y, et al. KCE Report 189C: Health Technology Assessment. Neuromodulation for the management of chronic pain: Implanted spinal cord stimulators and intrathecal analgesic delivery pumps. In: Centre BHCK, editor. Brussels2012.
8. North RB. SCS Trial Duration. Neuromodulation: Technology at the Neural Interface. 2003;6(1):4-5.
9. NHS Rightcare 2013 [updated 2013]. Available from: <http://www.rightcare.nhs.uk/resources>.
10. NHS Rightcare Atlas 2013 [cited 2013 04Apr13]. Available from: <http://www.rightcare.nhs.uk/atlas>.
11. N.I.C.E. NICE implementation programme 2012 [updated 14 November 2012]. Available from: [http://www.nice.org.uk/usingguidance/niceimplementationprogramme/nice\\_implementation\\_programme.jsp](http://www.nice.org.uk/usingguidance/niceimplementationprogramme/nice_implementation_programme.jsp).
12. N.I.C.E. NICE Implementation uptake report: Laparoscopic surgery for colorectal cancer. NICE Technology Appraisal 105. In: Excellence NIoHaC, editor. 2010.
13. N.I.C.E. Laparoscopic surgery for inguinal hernia repair: Implementation Uptake Report. Technology Appraisal 83. In: Excellence NIHaC, editor. 2004.
14. N.I.C.E. Obesity guidance on the prevention, identification, assessment and management of overweight and obesity in adults and children. Clinical Guidance CG43. In: Excellence NIHaC, editor. 2006.

- 1  
2  
3 15. Thomson S, Jacques L. Demographic Characteristics of Patients with Severe  
4 Neuropathic Pain Secondary to Failed Back Surgery Syndrome. *Pain Pract.* 2009;9(3):206-  
5 15.  
6 16. Tharmanathan P, Adamson J, Ashby R, et al. Diagnosis and treatment of failed  
7 back surgery syndrome in the UK: mapping of practice using a cross-sectional survey.  
8 *British Journal of Pain.* 2012;6(4):142-52.  
9 17. Mailis-Gagnon A, Furlan AD, Sandoval JA, et al. Spinal cord stimulation for  
10 chronic pain. *Cochrane Database Syst Rev.* 2004 (3):CD003783. PubMed PMID:  
11 15266501.  
12  
13  
14  
15  
16  
17  
18  
19  
20  
21  
22  
23  
24  
25  
26  
27  
28  
29  
30  
31  
32  
33  
34  
35  
36  
37  
38  
39  
40  
41  
42  
43  
44  
45  
46  
47  
48  
49  
50  
51  
52  
53  
54  
55  
56  
57  
58  
59  
60

For peer review only

# Impact of National Institute for Health and Care Excellence (NICE) guidance on medical technology uptake: Analysis of the uptake of spinal cord stimulation in England 2008-2012

Bharati Vyawahare<sup>1</sup>, Natalie Hallas<sup>2</sup>, Morag Brookes<sup>1</sup>, Rod S Taylor<sup>3</sup> & Sam Eldabe<sup>1</sup>

1. Department of Pain and Anaesthesia, James Cook University Hospital, Middlesbrough
2. Medtronic Limited UK, Watford, Hertfordshire
3. Institute of Health Research, University of Exeter Medical School, Exeter

## Abstract

**Background:** The National Institute for Health and Care Excellence (NICE) Technology Appraisal Guidance on spinal cord stimulation (SCS) was published in 2008 and updated in 2012 with no change. This guidance recommends SCS as a cost effective treatment for patients with neuropathic pain. **Objective:** To assess the impact of NICE guidance by comparing SCS uptake in England pre- (2008-2009) and post- (2009-2012) NICE guidance. We also compared the English SCS uptake rate with Belgium, Netherlands, France and Germany. **Design:** SCS implant data for England was obtained from the Hospital Episode Statistics database (HES) and compared with other European countries where comparable data were available. **Results:** The HES data showed ~~minimal~~ small increases in SCS implantation and replacement/revision procedures, and a large increase in SCS trials between 2008 and 2012. The increase in the total number of SCS procedures per million of population in England is driven primarily by revision/replacements and increased trial activity. Marked variability in SCS uptake at both health regions and primary care trust level was observed. **Conclusion:** Despite the positive NICE recommendation for the routine use of SCS, we found no evidence of a significant impact on SCS uptake in England. Rates of SCS implantation in England are lower than many other European countries.

## Article Summary

### 1. Article Focus

- The NHS in England and Wales is legally obligated to fund NICE Technology Appraisal-approved technologies within 90 days. The NICE



1  
2  
3  
4  
5  
6  
7  
8  
9  
10  
11  
12  
13  
14  
15  
16  
17  
18  
19  
20  
21  
22  
23  
24  
25  
26  
27  
28  
29  
30  
31  
32  
33  
34  
35  
36  
37  
38  
39  
40  
41  
42  
43  
44  
45  
46  
47  
48  
49  
50  
51  
52  
53  
54  
55  
56  
57  
58  
59  
60

Technology Appraisal approving Spinal Cord Stimulation for Neuropathic Pain was published in 2008.

- We examined the impact of the NICE Technology Appraisal on the overall uptake of spinal cord stimulation in England, in addition to regional variations in patient access.

## 2. Key Messages

- The NICE Technology Appraisal publication appears to have had **minimal negligible** impact on the uptake of spinal cord stimulation for new patients, and inequity of patient access remains despite clear evidence that this treatment is a cost-effective use of NHS resources.
- Reasons for this are multifactorial and include lack of guideline awareness, commissioning variation, lack of enforcement of NICE guidance and limited capacity at implanting centres.
- Some of these patient access barriers may be addressed with centralised commissioning of specialised services including spinal cord stimulation.

## 3. Strengths/limitations

- This study contributes a novel data analysis in the area of spinal cord stimulation, which highlights a lack of uptake of a cost-effective technology within the NHS.
- Our findings are based on data extracted from the Hospital Episodes Statistics database which relies on hospital coded data on procedures and indications.

## Introduction

The National Institute for Health and Care Excellence (NICE) is a Department of Health funded arms-length body, established in 1999 to principally reduce ‘the postcode lottery’ i.e. the variation in the availability and quality of NHS treatments and care in England and Wales(1, 2). NICE publishes various types of guidance including Technology Appraisals (TA), Clinical Guidelines, Quality Standards and Interventional Procedures Guidance (2). The TA guidance is based on evaluations of clinical and cost-effectiveness of selected technologies. The NHS is legally obliged to provide funding for medicines and treatments recommended within 3 months of the guidance (1). In December 2011, The Department of Health announced in its Innovation, Health and Wealth report that commissioners are expected to provide access to new treatments within 90 days of approval (1,3).

NICE TA guidance 159 on Spinal Cord Stimulation (SCS) for chronic pain of neuropathic or ischaemic origin was published in October 2008 and reviewed in January 2012 when no changes were made (4). This TA guidance approves SCS for adults with continued chronic neuropathic pain (measuring at least 50mm on 0-100mm visual analogue score) for at least 6 months despite all standard conventional treatment and after undergoing a successful trial of SCS by a multidisciplinary team (4).

We examined the data for SCS uptake in England between 2008 and 2012 in order to assess the impact of NICE TA guidance implementation. We compared this to the SCS implant rate in other European countries. Data was also requested from all Primary Care Trusts via a Freedom of Information request with regards to their SCS commissioning policy to determine whether a policy around the implementation of NICE guidance was in place or whether Individual Funding Requests (IFR) were being used.

## Methods

Data for pre- (2008-2009) and post- (2009-2010; 2010-2011; 2011-2012) NICE TA 159 publication for SCS procedural activity was obtained from the Hospital Episode Statistics (HES) database (5), using the QUANTIS system via NHIS (6). HES is a national statistical data warehouse for England of the care provided by NHS hospitals. QUANTIS is a database of NHS and social care numerical data for the UK and NHIS is a vendor that provides subscribed access to the QUANTIS database.

We examined OPCS-4 procedure codes A48.3 (Implantation of neurostimulator adjacent to spinal cord), A48.4 (Attention to neurostimulator adjacent to spinal cord) and A48.7 (Insertion of neurostimulator electrodes into spinal cord). The OPCS code A48.3 was assumed to reflect new permanent SCS implants, code A48.4 to contain both replacements and revisions, and code A48.7 to represent trial procedures. OPCS code 48.4 does not allow for a clear differentiation between battery replacement and revisions.

The relevant SCS codes were filtered by indication to ensure that only back pain and spinal indications were included. This eliminated any inclusion of other types of neurostimulation that may have been miscoded, for example for bowel and bladder indications. SCS uptake results are expressed per million populations across each Strategic Health Authority regions in England. We also compared uptake rates across Primary Care Trusts (PCT).

Oracle (11g Database) and Excel (Microsoft Office 2010 Pro) software programmes were utilised for the data analysis. We compared English SCS uptake data from 2011-12 (code A48.3 only) with European countries where we able to source the appropriate equivalent data, i.e. France, Belgium, Germany and the Netherlands (7).

## Results

The HES data analysis for year 2008-2012 showed a small increase in procedure codes 48.3 and 48.4 (Table 1a) and large increase in procedure code 48.7. Figure 2 illustrates the activity trends for each separate procedure code. On analysis of each of the procedure codes, the increase in SCS procedures appears to be driven primarily by replacements, revisions and a large increase in trial activity. There was considerable variation in the rate of SCS uptake across Strategic Health Authorities throughout this time horizon. The

1  
2  
3  
4  
5  
6  
7  
8  
9  
10  
11  
12  
13  
14  
15  
16  
17  
18  
19  
20  
21  
22  
23  
24  
25  
26  
27  
28  
29  
30  
31  
32  
33  
34  
35  
36  
37  
38  
39  
40  
41  
42  
43  
44  
45  
46  
47  
48  
49  
50  
51  
52  
53  
54  
55  
56  
57  
58  
59  
60

breakdown of the number of SCS procedures funded by PCTs in 2011-12 is shown in Figure 3, indicating considerable inequity of patient access to this NICE-approved treatment.

Table 1b compares the available European data against procedure code 48.3, reflecting the number of new SCS implants only. In France there was a small increase in the number of SCS implants per million of population for the period 2008-2010 (Table 1b). The rate of uptake of SCS per million of population in England is the lowest compared to these other European countries (Table 1b).

Figure 4 shows requested data from all Primary Care Trusts with regards to their SCS commissioning policy via a Freedom of Information request. The response rate was 60.9%, with 40.2% of PCTs requiring individual funding requests (IFR), 18.5% following a Specialised Commissioning Group (SCG) policy, 15.2% following either PCT policy or with no active policy, and only 10.8% following NICE TA Guidance allowing automatic funding. Whilst the level of data did not allow a statistical analysis of the correlation between the PCT policy status and the number of SCS procedures funded, some evidence of an association ~~correlation~~ between regions with an existing policy and the number of patients being funded for SCS was apparent. For example, across Yorkshire and the Humber, where a clear SCG policy was being followed by the collective PCTs, a high rate of SCS procedures was observed at 33.2 cases per million (Table 1a). This was also evident with the East of England (29.8 procedures per million). Conversely, the lowest rates of SCS referrals were reported in regions with no PCT or SCG policy in place, such as the West Midlands and London (7.9 and 9.4 procedures per million, respectively).

Table 1a. Total number of SCS procedures (combined A48.3 and A48.4 OPCS procedures) from 2008-2012.

| Regional SHA           | Population        | 2008 - 2009 |                 |                | 2009 - 2010 |                 |                | 2010 - 2011  |                 |                | 2011 - 2012  |                 |                |
|------------------------|-------------------|-------------|-----------------|----------------|-------------|-----------------|----------------|--------------|-----------------|----------------|--------------|-----------------|----------------|
|                        |                   | No. cases   | Cases / Million | 95% CI         | No. cases   | Cases / Million | 95% CI         | No. cases    | Cases / Million | 95% CI         | No. cases    | Cases / Million | 95% CI         |
| East Midlands          | 4,380,276         | 25          | 5.7             | 4 - 8          | 53          | 12.1            | 9 - 15         | 56           | 12.8            | 10 - 16        | 75           | 17.1            | 14 - 21        |
| East Of England        | 5,714,218         | 137         | 24.0            | 21 - 28        | 175         | 30.6            | 27 - 34        | 205          | 35.9            | 32 - 40        | 170          | 29.8            | 26 - 34        |
| London                 | 7,757,619         | 83          | 10.7            | 9 - 13         | 60          | 7.7             | 6 - 10         | 81           | 10.4            | 8 - 13         | 73           | 9.4             | 8 - 12         |
| North East             | 2,577,541         | 136         | 52.8            | 47 - 59        | 120         | 46.6            | 41 - 53        | 95           | 36.9            | 31 - 43        | 112          | 43.5            | 38 - 50        |
| North West             | 6,923,825         | 132         | 19.1            | 16 - 22        | 155         | 22.4            | 19 - 26        | 169          | 24.4            | 21 - 28        | 173          | 25.0            | 22 - 28        |
| South Central          | 4,069,352         | 20          | 4.9             | 3 - 7          | 39          | 9.6             | 7 - 13         | 44           | 10.8            | 8 - 14         | 38           | 9.3             | 7 - 13         |
| South East Coast       | 4,302,298         | 92          | 21.4            | 18 - 26        | 81          | 18.8            | 15 - 23        | 106          | 24.6            | 21 - 29        | 108          | 25.1            | 21 - 29        |
| South West             | 5,181,449         | 109         | 21.0            | 18 - 25        | 99          | 19.1            | 16 - 23        | 88           | 17.0            | 14 - 20        | 116          | 22.4            | 19 - 26        |
| West Midlands          | 5,421,595         | 50          | 9.2             | 7 - 12         | 53          | 9.8             | 8 - 13         | 45           | 8.3             | 6 - 11         | 43           | 7.9             | 6 - 11         |
| Yorkshire & the Humber | 5,244,956         | 123         | 23.5            | 20 - 27        | 133         | 25.4            | 22 - 29        | 172          | 32.8            | 29 - 37        | 174          | 33.2            | 29 - 37        |
| <b>Total</b>           | <b>51,573,129</b> | <b>907</b>  | <b>17.6</b>     | <b>17 - 19</b> | <b>968</b>  | <b>18.8</b>     | <b>18 - 20</b> | <b>1,061</b> | <b>20.6</b>     | <b>19 - 22</b> | <b>1,082</b> | <b>21.0</b>     | <b>20 - 22</b> |

**Table 1b.** Comparison of new SCS implants in UK (procedure code A48.3 only) against other European countries per year

| Country     | Yearly SCS/ Million |      |       |      |
|-------------|---------------------|------|-------|------|
|             | 2008                | 2009 | 2010  | 2011 |
| Belgium     |                     | 84.6 |       |      |
| France      | 9.19                | 8.17 | 11.35 |      |
| Netherlands |                     |      |       | 54.3 |
| Germany     |                     |      | 11.7  |      |
| UK(England) |                     |      | 11    | 10.7 |

Formatted Table

1  
2  
3  
4  
5  
6  
7 *Place Figures 1- 4 here*  
8

9 **Discussion**

10 The NHS has a mandatory duty to fund and provide NICE-approved treatments  
11 recommended within a NICE TA within 90 days. However, our UK data analysis from  
12 2008 to 2012 shows that NICE TA 159 had ~~minimal~~a small impact on uptake of SCS in  
13 neuropathic pain. Although an increase of 19.3% in SCS procedures was observed over the  
14 four year period, this figure includes battery replacements and revisions in addition to new  
15 SCS permanent implants. When new SCS implants are considered alone, an increase in  
16 uptake of only 12.4% percent was observed between 2008 and 2012 (Figure 2), despite the  
17 NICE TA 159 advocating a 10% increase in uptake each year. Interestingly the substantial  
18 rise in procedure code 48.7 (trial procedures) does not appear to convert into a comparable  
19 increase in permanent SCS procedures. Given that the conversion rate of trial to permanent  
20 SCS implants is generally consistent at around 75-80% (8), accuracy in provider coding in  
21 this instance may be questioned.  
22  
23  
24  
25  
26  
27  
28

29  
30 There remains considerable regional inequality in patient access to this NICE approved  
31 treatment. The Right Care (9) is one of the national work streams in the Department of  
32 Health (DH) Quality Innovation Productivity and Prevention programme (QIPP) which  
33 identifies unwarranted variation in NHS treatments based on geographical areas (9, 10).  
34 One of the Right Care objectives for 2011-2012 is to minimise this unwarranted variation  
35 and maximise value (9). Value can be increased by improving quality, optimising resource  
36 utilisation and ensuring that patients receive appropriate interventions.  
37  
38  
39  
40

41 Our findings are in contrast with a NICE implementation report (11) that shows a generally  
42 effective impact of guidance for surgical procedures. For example, laparoscopic colorectal  
43 surgeries occurred at higher rate than forecasted by NICE (TA 105) (12). Laparoscopic  
44 inguinal hernia repair uptake increased following guidance, but it stabilised at lower levels  
45 than NICE forecasted (TA 83) (13). In addition, there was overall increase in bariatric  
46 surgery for morbid obesity following NICE guidance (CG 43) (14). Our study provides  
47 data on the marked variability in rate of SCS uptake at both health authority and PCT level.  
48  
49  
50  
51

52  
53 NICE assessed SCS as a highly cost-effective treatment for failed back surgery syndrome  
54 with an incremental £10,480 per quality adjusted life year (QALY) ratio compared with  
55

1  
2  
3  
4  
5  
6  
7 conventional medical management alone, and £9219 per QALY gained when compared  
8 with repeat back operation (4). These ratios are considerably below the UK willingness to  
9 pay threshold of £20,000 to 30,000 per QALY.  
10

11  
12 Despite mandatory TA guidance on SCS, the majority of PCTs required Individual  
13 Funding Requests (IFR) for each patient (Figure 4). Some PCTs rated SCS as a low  
14 priority procedure. The reasons for the barriers to funding are multifactorial and include  
15 lack of awareness of SCS referral guidelines, lack of NICE TAG enforcement at regional  
16 and national level, as well as a limitation of clinical capacity at implanting centres. Due to  
17 the limitations of the available data it is not possible to disentangle the factors responsible  
18 for the continuing inequity of funding for SCS implants. Yet we can comment that there  
19 has been no significant increase in the number of implanting centres. The capacity within  
20 existing centres is not showing a growth curve as expected in response to the NICE  
21 guidance. Only 10.8% of PCTs implemented NICE guidance as a funding policy (Figure  
22 4). It is possible that piecemeal funding and the difficulties associated with such an  
23 approach, as well as the impact of the marked regional variations, have prevented the  
24 expansion of current providers. The reported incidence of failed back surgery syndrome is  
25 estimated as 10-40% of patients undergoing back surgery (15). In recent survey of the  
26 United Kingdom, 53% of pain clinics estimated 10% of their referrals comprised of failed  
27 back surgery syndrome patients and the remaining 47% of pain clinics estimated it as 20-  
28 30% of their referrals, therefore lack of candidates is unlikely (16).  
29  
30  
31  
32  
33  
34  
35  
36  
37

38  
39 In a comparison to France, Germany, Belgium and the Netherlands, England has the lowest  
40 rate of implants per million of the population. Smaller countries show a much higher rate  
41 of SCS implants (7), with Belgium and the Netherlands implanting 84.6 and 54.3 per  
42 million of population respectively. Nevertheless, for Belgium and the Netherlands only one  
43 year of data is available therefore we are unable to comment on trends. Data for France  
44 was available for the last three years (Table 1b) and shows no significant increase in SCS  
45 implants. The main indications for SCS are similar across the four countries i.e. failed  
46 back surgery syndrome or radicular pain, phantom pain, peripheral nerve injury, traumatic  
47 brachial plexus injury, spinal lesion, diabetic polyneuropathy and post herpetic neuralgia  
48 (7). Focusing on the most common indication for SCS of failed back surgery syndrome, it  
49 is estimated that 10-40% of patients undergoing spinal surgery will develop neuropathic  
50 pain (15). According to HES database, the number of spinal surgery procedures in England  
51  
52  
53  
54  
55



1  
2  
3  
4  
5  
6  
7 in 2009-2010 was 117,803 (17). Assuming that one third of these procedures is being  
8 carried out for pain, the annual estimate will be 78,533 procedures of which 10% to 40 %  
9 (7,853 to 31,414) would be expected to be eligible for SCS treatment (16). Based on this  
10 data, less than 2% of the eligible population of neuropathic patients in England are  
11 currently receiving SCS treatment. It is most plausible that a lack of awareness of SCS as  
12 a clinical and cost-effective treatment option amongst referring physicians may be  
13 hindering the uptake of this NICE-approved technology. More constructive engagement  
14 with the wider population of patients and referring physicians by the neuromodulation  
15 community is warranted to ensure appropriate and early referral for SCS therapy.  
16  
17  
18  
19

## 20 21 **Conclusion**

22 Our study shows that NICE TA 159 has had minimal-negligible impact on the uptake of  
23 SCS for new patients, and rates of SCS implantation were highly variable across Strategic  
24 Health Authorities and PCTs. The reasons for the lack of impact appear to be  
25 multifactorial, and however, may include a limited clinical awareness of SCS as an  
26 clinical and cost-effective treatment option amongst the wider referral community is likely  
27 to play a key role. – Within the new arrangements of NHS England, where SCS is deemed  
28 to be a prescribed specialised service that will be commissioned centrally, some of these  
29 barriers may be addressed including a shift towards more equitable access to this  
30 technology, and elimination of the use of Individual Funding Requests. Future  
31 implementation of NICE Innovation Scorecards to track compliance with NICE  
32 Technology Appraisals and other NICE compliance initiatives may further help to  
33 reinforce and track the implementation of NICE guidance.  
34  
35  
36  
37  
38  
39  
40  
41  
42  
43

## 44 **Figure Legends**

45 Figure 1. No. of SCS implanting centres year on year

46 Figure 2. Breakdown of SCS procedural activity trends (procedure codes A48.3, A48.4,  
47 and A48.7)

48 Figure 3. Number of total SCS procedures per PCT in 2011-12

49 Figure 4. Data from Freedom of Information request regarding PCT policies on SCS (data  
50 accessed 2011)

**Funding statement:** Access to the QUANTIS database to extract the relevant Hospital Episode Statistics data was funded by Medtronic UK. The planning, conduct and conclusions of this report are those of the authors and not the company.

**Competing interests statement:** Rod Taylor is a paid consultant for Medtronic Inc. Sam Eldabe has previously undertaken consulting work for Medtronic Inc.

#### References:

1. Sorenson C, Drummond M, Kanavos P, McGuire A. National Institute for Health and Clinical Excellence (NICE): How does it work and what are the implications for the U.S.? 2008 [updated April 2008]. Available from: [www.npcnow.org/issuearea/ebm.asp](http://www.npcnow.org/issuearea/ebm.asp).
2. N.I.C.E. How we work [updated 13 July 2012]. Available from: [http://www.nice.org.uk/aboutnice/howwework/how\\_we\\_work.jsp](http://www.nice.org.uk/aboutnice/howwework/how_we_work.jsp).
3. D.O.H. Creating Change: Innovating Health and Wealth One Year On. Health Do; 2011.
4. N.I.C.E. Technology Appraisal Guidelines 159: Spinal cord stimulation for chronic pain of neuropathic or ischaemic origin 2008 [updated Oct 2008]. Available from: [www.nice.org.uk/TA159](http://www.nice.org.uk/TA159).
5. Hospital Episode Statistics [cited 2013]. Available from: [www.hesonline.nhs.uk/](http://www.hesonline.nhs.uk/).
6. NHIS. Available from: <http://www.nhis.info/>.
7. Camberlin C, San Miguel L, Smit Y, Post P, Gerkens S, De Laet C. KCE Report 189C: Health Technology Assessment. Neuromodulation for the management of chronic pain: Implanted spinal cord stimulators and intrathecal analgesic delivery pumps. In: Centre BHCK, editor. Brussels2012.
8. North RB. SCS Trial Duration. Neuromodulation: Technology at the Neural Interface. 2003;6(1):4-5.
9. NHS Rightcare 2013 [updated 2013]. Available from: <http://www.rightcare.nhs.uk/resources>.
10. NHS Rightcare Atlas 2013 [cited 2013 04Apr13]. Available from: <http://www.rightcare.nhs.uk/atlas>.
11. N.I.C.E. NICE implementation programme 2012 [updated 14 November 2012]. Available from: [http://www.nice.org.uk/usingguidance/niceimplementationprogramme/nice\\_implementation\\_programme.jsp](http://www.nice.org.uk/usingguidance/niceimplementationprogramme/nice_implementation_programme.jsp).
12. N.I.C.E. NICE Implementation uptake report: Laparoscopic surgery for colorectal cancer. NICE Technology Appraisal 105. In: Excellence NIoHaC, editor. 2010.
13. N.I.C.E. Laparoscopic surgery for inguinal hernia repair: Implementation Uptake Report. Technology Appraisal 83. In: Excellence NIfHaC, editor. 2004.
14. N.I.C.E. Obesity guidance on the prevention, identification, assessment and management of overweight and obesity in adults and children. Clinical Guidance CG43. In: Excellence NIfHaC, editor. 2006.
15. Thomson S, Jacques L. Demographic Characteristics of Patients with Severe Neuropathic Pain Secondary to Failed Back Surgery Syndrome. Pain Pract. 2009;9(3):206-15.
16. Tharmanathan P, Adamson J, Ashby R, Eldabe S. Diagnosis and treatment of failed back surgery syndrome in the UK: mapping of practice using a cross-sectional survey. British Journal of Pain. 2012;6(4):142-52.

1  
2  
3  
4  
5  
6  
7  
8  
9  
10  
11  
12  
13  
14  
15  
16  
17  
18  
19  
20  
21  
22  
23  
24  
25  
26  
27  
28  
29  
30  
31  
32  
33  
34  
35  
36  
37  
38  
39  
40  
41  
42  
43  
44  
45  
46  
47  
48  
49  
50  
51  
52  
53  
54  
55  
56  
57  
58  
59  
60

17. Mailis-Gagnon A, Furlan AD, Sandoval JA, Taylor R. Spinal cord stimulation for chronic pain. Cochrane Database Syst Rev. 2004 (3):CD003783. PubMed PMID: 15266501.

For peer review only

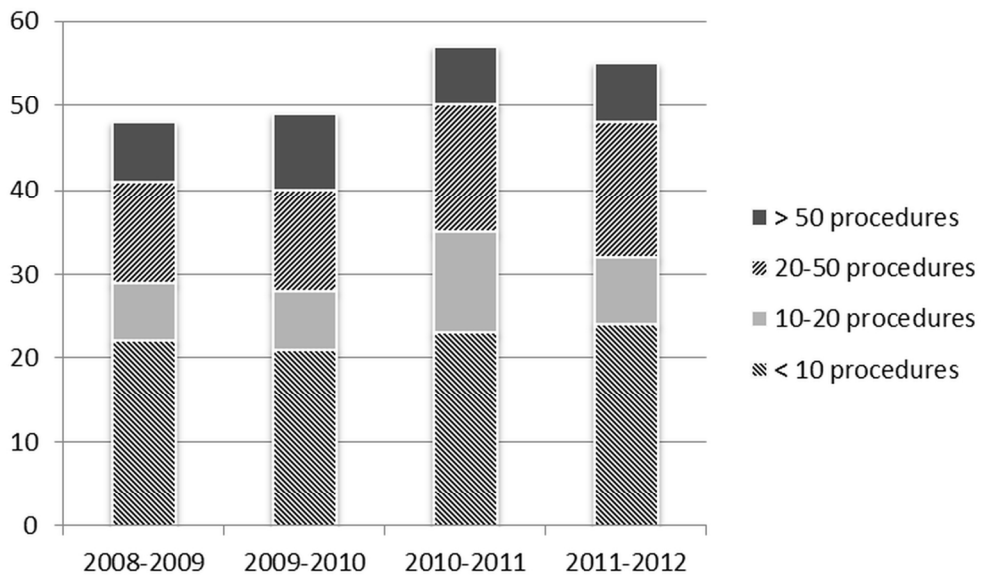

No. of SCS implanting centres year on year  
151x90mm (300 x 300 DPI)

review only

1  
2  
3  
4  
5  
6  
7  
8  
9  
10  
11  
12  
13  
14  
15  
16  
17  
18  
19  
20  
21  
22  
23  
24  
25  
26  
27  
28  
29  
30  
31  
32  
33  
34  
35  
36  
37  
38  
39  
40  
41  
42  
43  
44  
45  
46  
47  
48  
49  
50  
51  
52  
53  
54  
55  
56  
57  
58  
59  
60

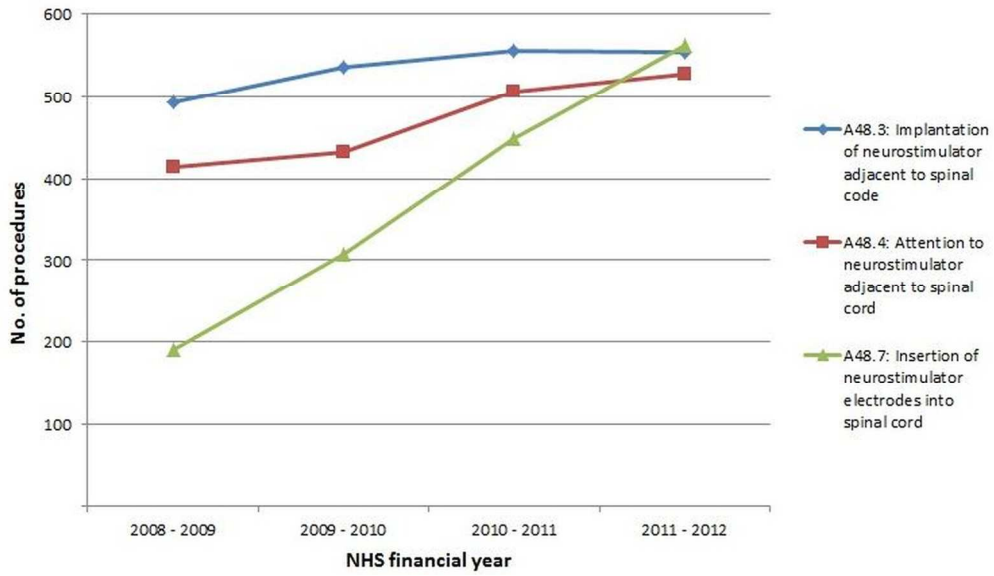

Breakdown of SCS procedural activity trends (procedure codes A48.3, A48.4, and A48.7)  
156x90mm (300 x 300 DPI)

review only

1  
2  
3  
4  
5  
6  
7  
8  
9  
10  
11  
12  
13  
14  
15  
16  
17  
18  
19  
20  
21  
22  
23  
24  
25  
26  
27  
28  
29  
30  
31  
32  
33  
34  
35  
36  
37  
38  
39  
40  
41  
42  
43  
44  
45  
46  
47  
48  
49  
50  
51  
52  
53  
54  
55  
56  
57  
58  
59  
60

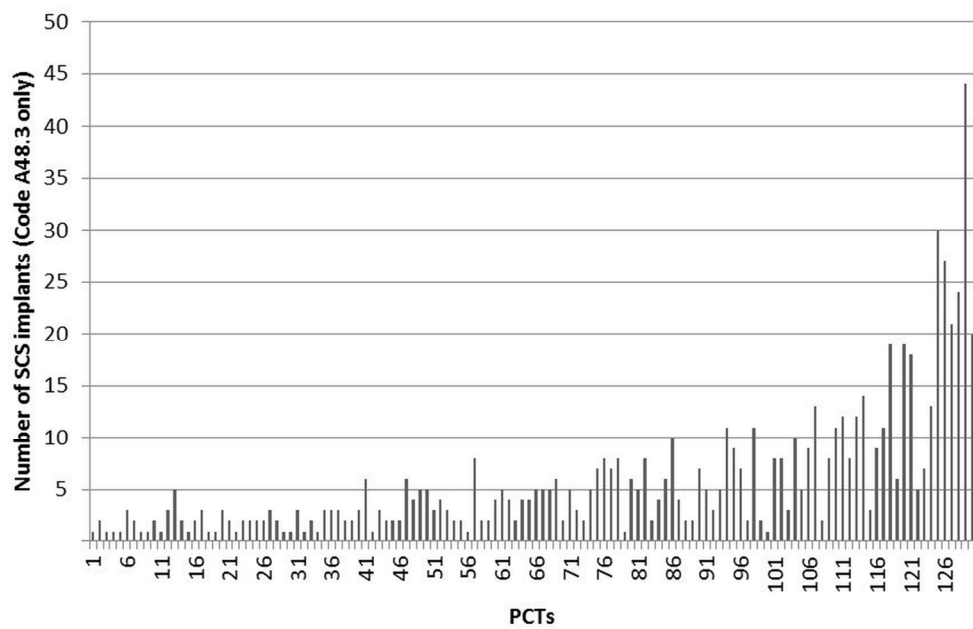

Number of total SCS procedures per PCT in 2011-12  
129x90mm (300 x 300 DPI)

view only

1  
2  
3  
4  
5  
6  
7  
8  
9  
10  
11  
12  
13  
14  
15  
16  
17  
18  
19  
20  
21  
22  
23  
24  
25  
26  
27  
28  
29  
30  
31  
32  
33  
34  
35  
36  
37  
38  
39  
40  
41  
42  
43  
44  
45  
46  
47  
48  
49  
50  
51  
52  
53  
54  
55  
56  
57  
58  
59  
60

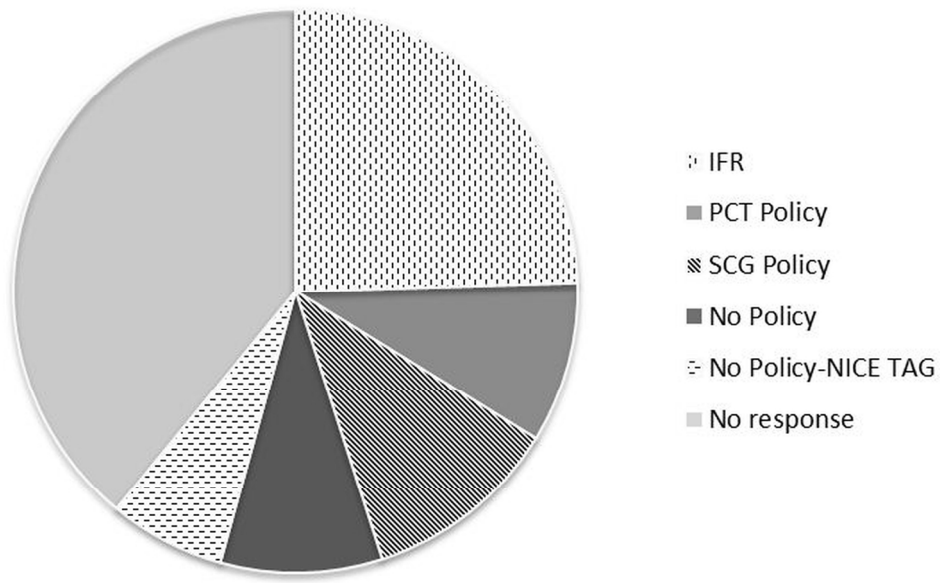

Data from Freedom of Information request regarding PCT policies on SCS (data accessed 2011)  
152x90mm (300 x 300 DPI)

review only
